# Supplementary material for: Carbonate System Parameters of an Algal-dominated Reef along West Maui
Source: Copernicus journal article supplement (doi:10.5194/bg-2018-35), 2018-01-23

**Supplementary Figure S1**

Time-series of (A) wind speed ( $\text{m s}^{-1}$ ) from the Kahului weather station, and (B) wave height (m) from the ADP.

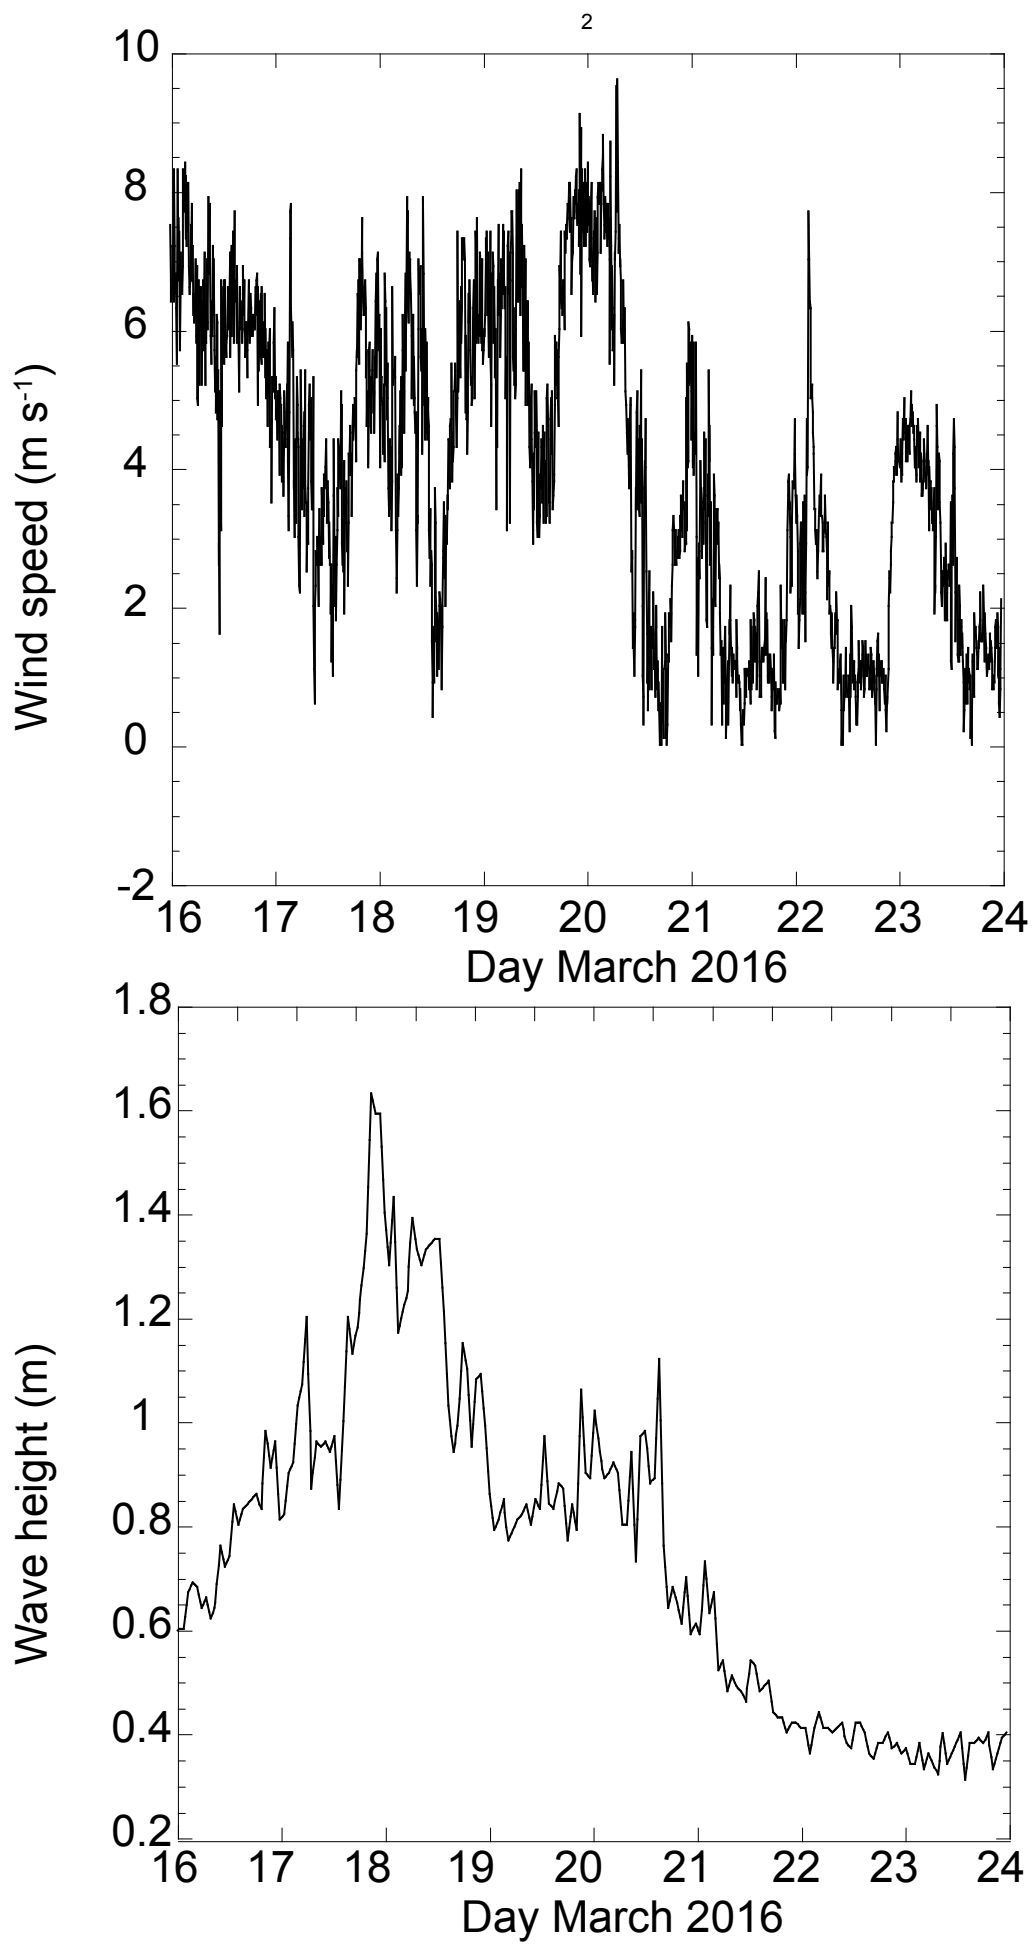

Supplement: Supplementary file 1 [file bg-2018-35-supplement.pdf]
